# Supplementary material for: The Association Between Oxidative Stress and Depressive Symptom Scores in Elderly Population: A Repeated Panel Study
Source: PubMed Central journal article supplement — J Prev Med Public Health. 2016 Aug 23;49(5):260–74. doi: 10.3961/jpmph.16.029 (PMC5066422; doi:10.3961/jpmph.16.029), 2016-08-23
Supplement: jpmph-49-5-260-supple1.pdf [file jpmph-49-5-260-supple1.pdf]

**Supplemental Table 1.** General characteristics of study participants across final study population and excluded participants

|                                      | <b>Final study population (n=478)</b> | <b>Excluded study participants (n=82)</b> | <b>p-value</b> |
|--------------------------------------|---------------------------------------|-------------------------------------------|----------------|
| Gender                               |                                       |                                           |                |
| Men                                  | 124 (25.94)                           | 22 (26.83)                                | 0.87           |
| Women                                | 354 (74.06)                           | 60 (73.17)                                |                |
| Age (y)                              |                                       |                                           |                |
| 60-69                                | 220 (46.03)                           | 27 (36.59)                                | 0.15           |
| 70-79                                | 237 (49.58)                           | 44 (60.98)                                |                |
| ≥80                                  | 21 (4.39)                             | 2 (2.44)                                  |                |
| History of hypertension              |                                       |                                           |                |
| No                                   | 225 (47.07)                           | 52 (63.41)                                | <0.01          |
| Yes                                  | 253 (52.93)                           | 30 (36.59)                                |                |
| History of diabetes mellitus         |                                       |                                           |                |
| No                                   | 397 (83.05)                           | 72 (87.80)                                | 0.28           |
| Yes                                  | 81 (16.95)                            | 10 (12.20)                                |                |
| Regular alcohol consumption          |                                       |                                           |                |
| No                                   | 364 (76.15)                           | 58 (89.23)                                | 0.02           |
| Yes                                  | 114 (23.85)                           | 7 (10.77)                                 |                |
| Did not answer                       |                                       | n=17                                      |                |
| Smoking status                       |                                       |                                           |                |
| Smoker                               | 28 (5.86)                             | 3 (4.41)                                  | 0.79           |
| Ex-smoker                            | 33 (6.90)                             | 3 (4.41)                                  |                |
| Non-smoker                           | 417 (87.24)                           | 62 (91.18)                                |                |
| Did not answer                       |                                       | n=14                                      |                |
| Education level                      |                                       |                                           |                |
| <Primary                             | 138 (28.87)                           | 17 (25.76)                                | 0.78           |
| Primary-Secondary                    | 213 (44.56)                           | 29 (43.94)                                |                |
| ≥Secondary                           | 127 (26.57)                           | 20 (30.30)                                |                |
| Did not answer                       |                                       | n=16                                      |                |
| Body mass index (kg/m <sup>2</sup> ) |                                       |                                           |                |
| <25.0                                | 271 (56.69)                           | 45 (54.88)                                | 0.19           |
| 25.0-29.9                            | 188 (39.33)                           | 30 (36.59)                                |                |
| ≥30                                  | 19 (3.97)                             | 7 (8.54)                                  |                |

Values are presented as number (%).
