# Supplementary material for: The Association Between Oxidative Stress and Depressive Symptom Scores in Elderly Population: A Repeated Panel Study
Source: PubMed Central journal article supplement — J Prev Med Public Health. 2016 Aug 23;49(5):260–74. doi: 10.3961/jpmph.16.029 (PMC5066422; doi:10.3961/jpmph.16.029), 2016-08-23
Supplement: jpmph-49-5-260-supple2.pdf [file jpmph-49-5-260-supple2.pdf]

**Supplemental Table 2.** Demographic properties of the study population from the first visit of participants (n=478)

|                                      | Depression (-)<br>(n=421) | Depression (+)<br>(n=57) | p-value <sup>1</sup> |
|--------------------------------------|---------------------------|--------------------------|----------------------|
| Gender                               |                           |                          |                      |
| Men                                  | 113 (26.84)               | 11 (19.30)               | 0.22                 |
| Women                                | 308 (73.16)               | 46 (80.70)               |                      |
| Age (y)                              |                           |                          |                      |
| 60-69                                | 199 (47.27)               | 21 (36.84)               | 0.03                 |
| 70-79                                | 207 (49.17)               | 30 (52.63)               |                      |
| ≥80                                  | 15 (3.56)                 | 6 (10.53)                |                      |
| History of hypertension              |                           |                          |                      |
| No                                   | 198 (47.03)               | 27 (47.37)               | 0.96                 |
| Yes                                  | 223 (52.97)               | 30 (52.63)               |                      |
| History of diabetes                  |                           |                          |                      |
| No                                   | 353 (83.85)               | 44 (77.19)               | 0.21                 |
| Yes                                  | 68 (16.15)                | 13 (22.81)               |                      |
| Regular alcohol consumption          |                           |                          |                      |
| No                                   | 318 (75.53)               | 46 (80.70)               | 0.39                 |
| Yes                                  | 103 (24.47)               | 11 (19.30)               |                      |
| Smoking status                       |                           |                          |                      |
| Smoker                               | 24 (5.70)                 | 4 (7.02)                 | 0.86                 |
| Ex-smoker                            | 30 (7.13)                 | 3 (5.26)                 |                      |
| Non-smoker                           | 367 (87.17)               | 50 (87.72)               |                      |
| Education level                      |                           |                          |                      |
| <Primary                             | 114 (27.08)               | 24 (42.11)               | 0.02                 |
| Primary-Secondary                    | 188 (44.66)               | 25 (43.86)               |                      |
| ≥Secondary                           | 119 (28.27)               | 8 (14.04)                |                      |
| Body mass index (kg/m <sup>2</sup> ) |                           |                          |                      |
| <25.0                                | 235 (55.82)               | 36 (63.16)               | 0.42                 |
| 25.0-29.9                            | 170 (40.38)               | 18 (31.85)               |                      |
| >30                                  | 16 (3.80)                 | 3 (5.26)                 |                      |

<sup>1</sup>p-values are calculated by  $\chi^2$  test.
