# Supplementary material for: The Association Between Oxidative Stress and Depressive Symptom Scores in Elderly Population: A Repeated Panel Study
Source: PubMed Central journal article supplement — J Prev Med Public Health. 2016 Aug 23;49(5):260–74. doi: 10.3961/jpmph.16.029 (PMC5066422; doi:10.3961/jpmph.16.029), 2016-08-23
Supplement: jpmph-49-5-260-supple3.pdf [file jpmph-49-5-260-supple3.pdf]

**Supplemental Table 3.** Associations of the log-transformed urinary concentration of MDA with depressive Sx scores (results from GEE analysis)

| Depressive Sx score | Crude |      |         | Model 1 <sup>1</sup> |      |         | Model 2 <sup>2</sup> |      |         |
|---------------------|-------|------|---------|----------------------|------|---------|----------------------|------|---------|
|                     | Beta  | SE   | p-value | Beta                 | SE   | p-value | Beta                 | SE   | p-value |
| Total (n=478)       |       |      |         |                      |      |         |                      |      |         |
| Total               | 0.49  | 0.08 | <0.01   | 0.42                 | 0.07 | <0.01   | 0.42                 | 0.07 | <0.01   |
| Emotion             | 0.52  | 0.08 | <0.01   | 0.45                 | 0.08 | <0.01   | 0.46                 | 0.08 | <0.01   |
| Somatic             | 0.29  | 0.11 | 0.01    | 0.20                 | 0.11 | 0.06    | 0.19                 | 0.11 | 0.08    |
| Affective           | 0.56  | 0.08 | <0.01   | 0.47                 | 0.07 | <0.01   | 0.48                 | 0.08 | <0.01   |
| Men (n=124)         |       |      |         |                      |      |         |                      |      |         |
| Total               | 0.40  | 0.13 | <0.01   | 0.37                 | 0.13 | <0.01   | 0.39                 | 0.13 | <0.01   |
| Emotion             | 0.39  | 0.13 | <0.01   | 0.37                 | 0.13 | <0.01   | 0.37                 | 0.13 | <0.01   |
| Somatic             | 0.19  | 0.25 | 0.44    | 0.15                 | 0.22 | 0.49    | 0.12                 | 0.24 | 0.62    |
| Affective           | 0.48  | 0.14 | <0.01   | 0.45                 | 0.14 | <0.01   | 0.48                 | 0.13 | <0.01   |
| Women (n=354)       |       |      |         |                      |      |         |                      |      |         |
| Total               | 0.49  | 0.09 | <0.01   | 0.42                 | 0.08 | <0.01   | 0.43                 | 0.08 | <0.01   |
| Emotion             | 0.52  | 0.10 | <0.01   | 0.46                 | 0.09 | <0.01   | 0.48                 | 0.10 | <0.01   |
| Somatic             | 0.29  | 0.12 | 0.02    | 0.21                 | 0.12 | 0.07    | 0.19                 | 0.12 | 0.11    |
| Affective           | 0.56  | 0.10 | <0.01   | 0.48                 | 0.09 | <0.01   | 0.49                 | 0.09 | <0.01   |

MDA, malondialdehyde; GEE, generalized estimating equation; Sx, symptom; SE, standard error.

<sup>1</sup>Model 1 was adjusted for age, gender, history of diabetes mellitus, and educational level.

<sup>2</sup>Model 2 was adjusted for model 1 plus history of hypertension, alcohol consumption, body mass index, fasting glucose, urinary cotinine, and systolic blood pressure.
