# Supplementary material for: The Association Between Oxidative Stress and Depressive Symptom Scores in Elderly Population: A Repeated Panel Study
Source: PubMed Central journal article supplement — J Prev Med Public Health. 2016 Aug 23;49(5):260–74. doi: 10.3961/jpmph.16.029 (PMC5066422; doi:10.3961/jpmph.16.029), 2016-08-23
Supplement: jpmph-49-5-260-supple4.pdf [file jpmph-49-5-260-supple4.pdf]

| No. | 1st examination cycle<br>(Sep 2008-Dec 2008) | 2nd examination cycle<br>(Apr 2009-Dec 2009) | 3rd examination cycle<br>(Mar 2010-Aug 2010) |
|-----|----------------------------------------------|----------------------------------------------|----------------------------------------------|
| 408 | Study enrollment                             |                                              |                                              |
|     |                                              |                                              | Maximum 3 visits                             |
| 109 |                                              | Study enrollment                             |                                              |
|     |                                              |                                              | Maximum 2 visits                             |
| 43  |                                              |                                              | Study enrollment                             |
|     |                                              |                                              | Maximum 1 visit                              |

**Supplemental Figure 1.** Detailed structure and depression/urinary malondialdehyde examination cycle of Korean Elderly Environmental Panel study (n=560).
