# Supplementary material for: The Association Between Oxidative Stress and Depressive Symptom Scores in Elderly Population: A Repeated Panel Study
Source: PubMed Central journal article supplement — J Prev Med Public Health. 2016 Aug 23;49(5):260–74. doi: 10.3961/jpmph.16.029 (PMC5066422; doi:10.3961/jpmph.16.029), 2016-08-23
Supplement: jpmph-49-5-260-supple5.pdf [file jpmph-49-5-260-supple5.pdf]

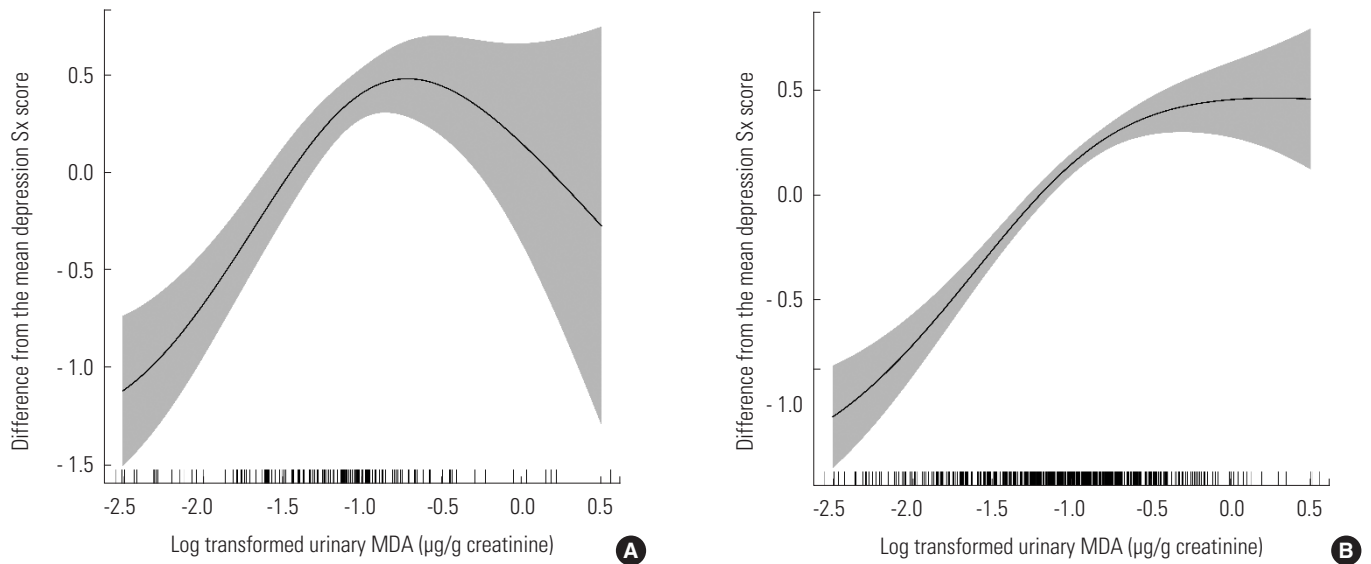

**Supplemental Figure 2.** Non-parametric association between urinary malondialdehyde (MDA) concentration with depression symptom (Sx) score (results of generalized additive mixed models analysis). (A) Men, (B) women. Data was adjusted for age, history of hypertension and diabetes mellitus, alcohol consumption, educational level, body mass index, urinary cotinine, fasting glucose level, and systolic blood pressure.
